# Supplementary material
Source: PubMed Central journal article supplement (PMC3138484)
Supplement: NIHMS296516-supplement-Supplement1.pdf [file NIHMS296516-supplement-Supplement1.pdf]

## Supplementary Appendix

This appendix has been provided by the authors to give readers additional information about their work.

Supplement to: Truman RW, Singh P, Sharma R, et al. Probable zoonotic leprosy in the southern United States. N Engl J Med 2011;364:1626-33.

## Supplementary Data

**Table S1: Demographics and genotype of *M. leprae* from humans and armadillos in US (Excel sheet).** The reads from NHDP-55, NHDP-98 and I-30 resequencing analysis may be found in the trace depository under SRP001064.



**Table S2. Primers used for PCR and genotyping**

| Locus          | Sequence (5'-3')                  |
|----------------|-----------------------------------|
| SNP-7614-F     | CGC TGA GAC GAT GGG CAA TTA CC    |
| SNP-7614-R     | TTG CCC ATC AAC CAA GGG ATA CCG   |
| SNP-10505-F    | CCA ATT TGC TTG CAT TCC A         |
| SNP-10505-R    | AAC ACT GCA CCG ACC AAC TC        |
| InDel_17915-F  | GGG GAG GCG AGT ATA GAT CC        |
| InDel_17915-R  | AGG CGC TGG TCT GCT ATC TA        |
| SNP-22488-F    | ATG CTC TGC GGT ACC AGT CT        |
| SNP-22488-R    | AGC CCT ACC TGA TCG ACA AC        |
| SNP-29563-F    | AGC GCC AAA CAG CAC TAA AG        |
| SNP-29563-R    | TCT GAC GAT ATG GCG ACA AC        |
| SNP-365411-F   | CGA GGT ATT TAC CGC AAT GG        |
| SNP-365411-R   | CGT GGT TAG GGT GAC AAC AC        |
| SNP-38202-F    | GGG TGC ACG TAG AGT TGG AT        |
| SNP-38202-R    | CTC CGC CGA CGT ACA AAT           |
| SNP-45791-F    | TGG GAA TTC TTA TAA ATC CAT TCT G |
| SNP-45791-R    | AGA GGG TTG AAA TTG GCA CA        |
| SNP-116225-F   | GCT TTC CAT TCA CGA CCA G         |
| SNP-116225-R   | AAG TTC GAT CGG TTC ACC AC        |
| INDEL-408352-F | TGT TGG GCA GTA GCA GGT TA        |
| INDEL-408352-R | ATC CAG ACG CTA TTG GCA AC        |
| SNP-574640-F   | CGT TCG ACA AGC TCA AGG TC        |
| SNP-574640-R   | GCC GAT CAA TCC CAT GAG TA        |
| SNP-604326-F   | GCC CAG TTA AGC GGT CTT TA        |
| SNP-604326-R   | AGG TCC CGT CAA GAA CCA G         |
| SNP-623366-F   | ATG GCT ACC GTG TGC AAT G         |
| SNP-623366-R   | TCT CCA AGG TGA GCT CGA TT        |
| SNP-1017410-F  | ATC CTG GGA TTG GAG GAT TC        |
| SNP-1017410-R  | TGT TCC TCA CTG CGA TGT CT        |
| SNP-1113926-F  | CCT CAT TTG CTG TGG ACC TCA GTG   |
| SNP-1113926-R  | ATG TCA TCT TCC AGG GCG AAA AGC   |
| SNP-1164294-F  | CGA CGT GGG TAC AGT CGA T         |
| SNP-1164294-R  | GGT AGT CAC CCG GAG CAC           |
| SNP-1291021-F  | GTA GTT CGT TAC CGC CAG GA        |
| SNP-1291021-R  | TGA GTT TTG GTC GTG ACC TG        |
| SNP-1450891-F  | CAA TAC TGC GGT CGT CTC AA        |
| SNP-1450891-R  | AAA TGA CCA TCA CGA CGA CA        |
| SNP-1527056-F  | TTA AGC CAA TAT CGC CGA AC        |
| SNP-1527056-R  | GTT GAC AAC GGC TGA CAG AT        |
| SNP-156948-F   | ACA CCA CCA AGC CGT ATT GT        |
| SNP-156948-R   | CTT TTC CTG TTG GGT TGG TG        |
| SNP-1588116-F  | GCA GGT CCT TAC CGA TGA GA        |
| SNP-1588116-R  | GCT AGC GAC TCA ACT GAG CA        |
| SNP-1734701-F  | AGA GCG GAG TGT AGT CAC CAG       |
| SNP-1734701-R  | CTT CTT TGT GCC CGC ATA TC        |
| SNP-1787203-F  | GCG AGT TGA ACA CCA CGA C         |
| SNP-1787203-R  | CGC AGT TGA TCG GTA TTG G         |

|                 |                             |
|-----------------|-----------------------------|
| SNP-1928726-F   | AAC AGA TCG GCC ATG AAC TC  |
| SNP-1928726-R   | GAT CGA AGA GAC TCG GAT GC  |
| SNP-193848 -R   | CGC CAC CGT AGA ATT TGT TT  |
| SNP-193848-F    | CCC AGT CCT GTT CGT AAT CC  |
| SNP-2200539-F   | ATC ACA TTC GCT CCC CTT TT  |
| SNP-2200539-R   | AAA CGC CTG TTA AGC GAT TG  |
| SNP-2999984-F   | AGC TGG CTG CGA CTA CAA CT  |
| SNP-2999984-R   | CGA TCT TCG AGG ACT TGT CA  |
| SNP-3110867-F   | CCA GGG ATT ATT GTG CTG CT  |
| SNP-3110867-R   | GGG GAA TTG CTT TGT TAT CG  |
| SNP-3112678-F   | GGC ACA GGA GAC TCT GGT TG  |
| SNP-3112678-R   | CCA TCC ATT TAT TCC AGA GCA |
| INDEL-3224930-F | ATC ACC GGT AAC ATC CAC CA  |
| INDEL-3224930-R | TAA CGA AGT GGG GAA ACA GG  |

Fragment spanning the reported SNP was amplified with set of primers and sequenced with reverse and forward primers. Sequence was aligned with TN reference genome to identify corresponding SNP variation in particular strain.

| <b>Table S3. Primers used for VNTR analysis</b> |   |                                    |                                  |
|-------------------------------------------------|---|------------------------------------|----------------------------------|
| VNTR locus                                      |   | Sequence                           | Product size (bp) with TN strain |
| AC8a                                            | F | GTG TTA CGC GGA ACC AGG CA         | 124                              |
|                                                 | R | CCA TCT GTT GGT ACT ACT GA         |                                  |
| AC8b                                            | F | GAT GCG ACT ATC ACT CGC ACG CAG TT | 140                              |
|                                                 | R | GCT GGT TTC CTT CTA GTC CC         |                                  |
| AC9                                             | F | GCC TGG TGC CCG GAC AAT GC         | 146                              |
|                                                 | R | ACA TCA CAC TGA TCT CGC CGG CGC T  |                                  |
| AT17                                            | F | GAC ACA CTC GAT CTC AGT AG         | 180                              |
|                                                 | R | TTA GCA GGA CGA TTG TAC AG         |                                  |
| GGT5                                            | F | TCA CCA TCG ACG CTC CGG GT         | 161                              |
|                                                 | R | TCG GCC TGG TTG TCT GCC TT         |                                  |
| GTA9                                            | F | CGC AGA TGCAACGAT CAC              | 122                              |
|                                                 | R | AAT ATG CAT GCC GGT GGT            |                                  |
| 6-7                                             | F | CTA CTT GCG CGC CAC CGC CA         | 191                              |
|                                                 | R | GCC GTC GCC AGG TTT TGC AG         |                                  |
| 12-5                                            | F | CTG GTC CAC TTG CGG TAC GAC        | 289                              |
|                                                 | R | GGA GAA GGA GGC CGA ATA CA         |                                  |
| 21-3                                            | F | TGT TGA AAT TTG GCG GCC AT         | 180                              |
|                                                 | R | TGC AAG GAG TGC TCA GCT AT         |                                  |
| 23-3                                            | F | CAG TCG CCC GGA TAC TGT TA         | 190                              |
|                                                 | R | TAA ATC CGC TCC CAA ATC TT         |                                  |
| 27-5                                            | F | GTG CTG TGC CTG CAG CCG TT         | 270                              |
|                                                 | R | TCC CCA AAG CCG CCG AAT CC         |                                  |

Primers were used to amplify the VNTR loci and the resultant fragments analysed by gel electrophoresis. After confirmation of a single band, fragment analysis was performed in ABI 310 genetic analyzer. Each electrophoretogram was compared with known molecular weight markers to determine number of repeats at every VNTR locus.

**Table S4: SNP and InDel marker's restricted to 3I strains (Excel sheet).** Details of the 52 SNPs where all four resequenced genomes (NHDP-55,63,98 & I-30) conflicted with the standard strains (TN, Br 4923 and Thai 53), and 21 locations where the 3I strains further differed among themselves.

**Table S4: SNP and InDel marker's restricted to 3I strains**

|    |                                                                                                                                              | Type | TN genome position | TN, Br4923, Thai53 | NHDP-55 (57X)   | NHDP-63 (46X) | NHDP-98 (78X) | I-30 (22X) | Strains conflicting from TN genome |                      |
|----|----------------------------------------------------------------------------------------------------------------------------------------------|------|--------------------|--------------------|-----------------|---------------|---------------|------------|------------------------------------|----------------------|
| 1  | 52 SNPs WHERE ALL FOUR RESEQUENCED GENOMES (NHDP-55,63,98 & I-30) WERE CONFLICTING FROM COMPLETE SEQUENCES GENOMES (TN, Br 4923 AND Thai 53) | 1    | SNP                | 883                | G               | A             | A             | A          | NHDP-55,63,98 & I-30               |                      |
| 2  |                                                                                                                                              | 2    | SNP                | 1,011              | G               | A             | A             | A          | NHDP-55,63,98 & I-30               |                      |
| 3  |                                                                                                                                              | 3    | SNP                | 7,614              | C               | T             | T             | T          | NHDP-55,63,98 & I-30               |                      |
| 4  |                                                                                                                                              | 4    | SNP                | 10,505             | C               | T             | T             | T          | NHDP-55,63,98 & I-30               |                      |
| 5  |                                                                                                                                              | 5    | SNP                | 15,985             | G               | A             | A             | A          | NHDP-55,63,98 & I-30               |                      |
| 6  |                                                                                                                                              | 6    | InDel              | 17,915             | TTGGTG<br>GTGTA | -             | -             | -          | -                                  | NHDP-55,63,98 & I-30 |
| 7  |                                                                                                                                              | 7    | SNP                | 22,488             | G               | A             | A             | A          | NHDP-55,63,98 & I-30               |                      |
| 8  |                                                                                                                                              | 8    | SNP                | 29,563             | C               | T             | T             | T          | NHDP-55,63,98 & I-30               |                      |
| 9  |                                                                                                                                              | 9    | SNP                | 38,202             | C               | T             | T             | T          | NHDP-55,63,98 & I-30               |                      |
| 10 |                                                                                                                                              | 10   | SNP                | 45,791             | T               | C             | C             | C          | NHDP-55,63,98 & I-30               |                      |
| 11 |                                                                                                                                              | 11   | SNP                | 48,196             | G               | A             | A             | A          | NHDP-55,63,98 & I-30               |                      |
| 12 |                                                                                                                                              | 12   | SNP                | 116,225            | C               | T             | T             | T          | NHDP-55,63,98 & I-30               |                      |
| 13 |                                                                                                                                              | 13   | SNP                | 156,948            | C               | T             | T             | T          | NHDP-55,63,98 & I-30               |                      |
| 14 |                                                                                                                                              | 14   | SNP                | 193,848            | C               | T             | T             | T          | NHDP-55,63,98 & I-30               |                      |
| 15 |                                                                                                                                              | 15   | SNP                | 305310             | G               | A             | A             | A          | NHDP-55,63,98 & I-30               |                      |
| 16 |                                                                                                                                              | 16   | SNP                | 365,411            | A               | G             | G             | G          | NHDP-55,63,98 & I-30               |                      |
| 17 |                                                                                                                                              | 17   | InDel              | 408,352            | -               | G             | G             | G          | G                                  | NHDP-55,63,98 & I-30 |
| 18 |                                                                                                                                              | 18   | SNP                | 574,640            | G               | A             | A             | A          | A                                  | NHDP-55,63,98 & I-30 |
| 19 |                                                                                                                                              | 19   | SNP                | 604,326            | T               | C             | C             | C          | C                                  | NHDP-55,63,98 & I-30 |
| 20 |                                                                                                                                              | 20   | SNP                | 623,366            | C               | T             | T             | T          | T                                  | NHDP-55,63,98 & I-30 |
| 21 |                                                                                                                                              | 21   | SNP                | 774,705            | G               | A             | A             | A          | A                                  | NHDP-55,63,98 & I-30 |
| 22 |                                                                                                                                              | 22   | SNP                | 954,665            | T               | C             | C             | C          | C                                  | NHDP-55,63,98 & I-30 |
| 23 |                                                                                                                                              | 23   | SNP                | 1,017,410          | G               | A             | A             | A          | A                                  | NHDP-55,63,98 & I-30 |
| 24 |                                                                                                                                              | 24   | SNP                | 1,038,672          | C               | T             | T             | T          | T                                  | NHDP-55,63,98 & I-30 |
| 25 |                                                                                                                                              | 25   | SNP                | 1,113,926          | A               | G             | G             | G          | G                                  | NHDP-55,63,98 & I-30 |
| 26 |                                                                                                                                              | 26   | SNP                | 1,160,429          | C               | G             | G             | G          | G                                  | NHDP-55,63,98 & I-30 |
| 27 |                                                                                                                                              | 27   | SNP                | 1,164,294          | C               | T             | T             | T          | T                                  | NHDP-55,63,98 & I-30 |
| 28 |                                                                                                                                              | 28   | SNP                | 1,217,339          | G               | A             | A             | A          | A                                  | NHDP-55,63,98 & I-30 |
| 29 |                                                                                                                                              | 29   | SNP                | 1,291,021          | G               | A             | A             | A          | A                                  | NHDP-55,63,98 & I-30 |
| 30 |                                                                                                                                              | 30   | SNP                | 1,329,462          | C               | T             | T             | T          | T                                  | NHDP-55,63,98 & I-30 |
| 31 |                                                                                                                                              | 31   | SNP                | 1,450,891          | G               | A             | A             | A          | A                                  | NHDP-55,63,98 & I-30 |
| 32 |                                                                                                                                              | 32   | SNP                | 1,466,044          | C               | A             | A             | A          | A                                  | NHDP-55,63,98 & I-30 |
| 33 |                                                                                                                                              | 33   | SNP                | 1,527,056          | G               | C             | C             | C          | C                                  | NHDP-55,63,98 & I-30 |
| 34 |                                                                                                                                              | 34   | SNP                | 1,585,804          | A               | G             | G             | G          | G                                  | NHDP-55,63,98 & I-30 |
| 35 |                                                                                                                                              | 35   | SNP                | 1,588,116          | G               | C             | C             | C          | C                                  | NHDP-55,63,98 & I-30 |
| 36 |                                                                                                                                              | 36   | SNP                | 1,657,377          | G               | T             | T             | T          | T                                  | NHDP-55,63,98 & I-30 |
| 37 |                                                                                                                                              | 37   | SNP                | 1,734,701          | G               | A             | A             | A          | A                                  | NHDP-55,63,98 & I-30 |
| 38 |                                                                                                                                              | 38   | SNP                | 1,759,655          | G               | A             | A             | A          | A                                  | NHDP-55,63,98 & I-30 |
| 39 |                                                                                                                                              | 39   | SNP                | 1,787,403          | C               | T             | T             | T          | T                                  | NHDP-55,63,98 & I-30 |
| 40 |                                                                                                                                              | 40   | SNP                | 1,897,193          | C               | A             | A             | A          | A                                  | NHDP-55,63,98 & I-30 |
| 41 |                                                                                                                                              | 41   | SNP                | 1,900,012          | G               | A             | A             | A          | A                                  | NHDP-55,63,98 & I-30 |
| 42 |                                                                                                                                              | 42   | SNP                | 1,928,726          | A               | C             | C             | C          | C                                  | NHDP-55,63,98 & I-30 |
| 43 |                                                                                                                                              | 43   | SNP                | 1,962,043          | C               | T             | T             | T          | T                                  | NHDP-55,63,98 & I-30 |
| 44 |                                                                                                                                              | 44   | SNP                | 2,200,739          | C               | T             | T             | T          | T                                  | NHDP-55,63,98 & I-30 |
| 45 |                                                                                                                                              | 45   | SNP                | 2,542,320          | G               | A             | A             | A          | A                                  | NHDP-55,63,98 & I-30 |
| 46 |                                                                                                                                              | 46   | SNP                | 2,714,886          | T               | A             | A             | A          | A                                  | NHDP-55,63,98 & I-30 |
| 47 |                                                                                                                                              | 47   | SNP                | 2,784,331          | A               | G             | G             | G          | G                                  | NHDP-55,63,98 & I-30 |
| 48 |                                                                                                                                              | 48   | SNP                | 2,978,382          | C               | A             | A             | A          | A                                  | NHDP-55,63,98 & I-30 |
| 49 |                                                                                                                                              | 49   | SNP                | 2,999,984          | C               | T             | T             | T          | T                                  | NHDP-55,63,98 & I-30 |
| 50 |                                                                                                                                              | 50   | SNP                | 3,110,867          | T               | C             | C             | C          | C                                  | NHDP-55,63,98 & I-30 |
| 51 |                                                                                                                                              | 51   | SNP                | 3,112,678          | C               | T             | T             | T          | T                                  | NHDP-55,63,98 & I-30 |
| 52 |                                                                                                                                              | 52   | InDel              | 3,224,930          | -               | G             | G             | G          | G                                  | NHDP-55,63,98 & I-30 |
| 53 | 21 SNPs IDENTIFIED WHERE AT LEAST ONE STRAIN DIFFERED FROM THE REST OF THREE                                                                 | 1    | SNP                | 604178             | G               | A             | G             | G          | NHDP-55                            |                      |
| 54 |                                                                                                                                              | 2    | SNP                | 1514420            | T               | C             | T             | T          | NHDP-55                            |                      |
| 55 |                                                                                                                                              | 3    | InDel              | 1978176            | C               | -             | C             | C          | NHDP-55                            |                      |
| 56 |                                                                                                                                              | 4    | SNP                | 2116512            | A               | G             | A             | A          | NHDP-55                            |                      |
| 57 |                                                                                                                                              | 5    | InDel              | 2322401            | G               | -             | G             | G          | NHDP-55                            |                      |
| 58 |                                                                                                                                              | 6    | SNP                | 21139              | G               | G             | T             | G          | NHDP-63                            |                      |
| 59 |                                                                                                                                              | 7    | SNP                | 509579             | G               | G             | A             | G          | NHDP-63                            |                      |
| 60 |                                                                                                                                              | 8    | SNP                | 530686             | C               | C             | T             | C          | NHDP-63                            |                      |
| 61 |                                                                                                                                              | 9    | SNP                | 1070054            | C               | C             | T             | C          | NHDP-63                            |                      |
| 62 |                                                                                                                                              | 10   | SNP                | 1206344            | C               | C             | T             | C          | NHDP-63                            |                      |
| 63 |                                                                                                                                              | 11   | SNP                | 1996640            | C               | C             | T             | C          | NHDP-63                            |                      |
| 64 |                                                                                                                                              | 12   | SNP                | 2119399            | A               | A             | G             | A          | NHDP-63                            |                      |
| 65 |                                                                                                                                              | 13   | SNP                | 2184972            | T               | C             | T             | C          | NHDP-63                            |                      |
| 66 |                                                                                                                                              | 14   | InDel              | 3106517            | -               | A             | -             | A          | NHDP-63                            |                      |
| 67 |                                                                                                                                              | 15   | InDel              | 667972             | -               | G             | G             | -          | NHDP-98                            |                      |
| 68 |                                                                                                                                              | 16   | SNP                | 2116786            | C               | T             | T             | T          | I-30 (W-09)                        |                      |
| 69 |                                                                                                                                              | 17   | SNP                | 509024             | T               | C             | C             | T          | NHDP-55 & 63, I-30                 |                      |
| 70 |                                                                                                                                              | 18   | SNP                | 1223297            | C               | T             | T             | C          | NHDP-55 & 63, I-30                 |                      |
| 71 |                                                                                                                                              | 19   | SNP                | 1600438            | T               | G             | G             | T          | NHDP-55 & 63, I-30                 |                      |
| 72 |                                                                                                                                              | 20   | SNP                | 1797215            | C               | T             | T             | C          | NHDP-55 & 63, I-30                 |                      |
| 73 |                                                                                                                                              | 21   | SNP                | 1983613            | C               | T             | T             | C          | NHDP-55 & 63, I-30                 |                      |

52 SNPs WHERE ALL FOUR RE-SEQUENCED GENOMES (NHDP-55,63,98 & I-30) CONFLICTED WITH STANDARD STRAINS (TN, Br 4923 AND Thai 53)

21 SNPs IDENTIFIED WHERE AT LEAST ONE STRAIN DIFFERED FROM THE OTHER THREE



**Table S5. Genotypes of *M. leprae* infecting humans and armadillos in the US**

| Source                        | Report State   | EE          | Residence history* | Genotype | n  | VNTR profile <sup>#</sup> |      |     |      |      |     |      |      |      |      |
|-------------------------------|----------------|-------------|--------------------|----------|----|---------------------------|------|-----|------|------|-----|------|------|------|------|
|                               |                |             |                    |          |    | AC8a                      | AC8b | AC9 | GGT5 | GTA9 | 6-7 | 12-5 | 21-3 | 23-3 | 27-5 |
| HUMAN PATIENTS REPORTED IN US | LA             | Y           | NFR                | 1A-v1    | 1  | 11                        | 7    | 9   | 5    | 9    | 7   | 5    | 3    | 2    | 5    |
|                               | CO             | N           | Philippines        | 1A-v2    | 1  | 8                         | 8    | 8   | 5    | 9    | 7   | 5    | 3    | 2    | 5    |
|                               | FL             | N           | Paraguay           | 1D-v1    | 1  | 7                         | 7    | 9   | 4    | 13   | 5   | 4    | 2    | 2    | 5    |
|                               | LA             | Y           | NFR                | 3I-1-v1  | 1  | 9                         | 7    | 8   | 4    | 10   | 5   | 5    | 2    | 2    | 4    |
|                               | LA             | Y           | Puerto Rico        | 3I-1-v2  | 1  | 9                         | 7    | 8   | 4    | 9    | 5   | 4    | 2    | 2    | 5    |
|                               | NY             | N           | Dominican Republic | 3I-1-v3  | 1  | 10                        | 7    | 8   | 4    | 10   | 6   | 5    | 2    | 2    | 4    |
|                               | MA             | N           | Brazil             | 3I-1-v4  | 1  | 10                        | 7    | 8   | 4    | 9    | 6   | 5    | 2    | 2    | 4    |
|                               | LA, TX, AR, GA | Y           | Various            | 3I-2-v1  | 25 | 10                        | 7    | 8   | 4    | 10   | 7   | 5    | 2    | 2    | 4    |
|                               | NM             | Y           | Mexico             | 3I-2-v2  | 1  | 11                        | 7    | 8   | 4    | 10   | 6   | 5    | 2    | 2    | 4    |
|                               | CA             | Y           | Mexico             | 3I-2-v3  | 1  | 10                        | 8    | 8   | 4    | 10   | 7   | 5    | 2    | 2    | 4    |
|                               | AR             | Y           | NFR                | 3I-2-v4  | 1  | 10                        | 7    | 9   | 4    | 10   | 6   | 5    | 2    | 4    | 4    |
|                               | TX             | Y           | Mexico             | 3I-2-v5  | 1  | 10                        | 7    | 8   | 4    | 10   | 7   | 5    | 3    | 2    | 4    |
|                               | LA             | Y           | NFR                | 3I-2-v6  | 1  | 10                        | 7    | 8   | 4    | 10   | 7   | 4    | 2    | 2    | 4    |
|                               | LA             | Y           | NFR                | 3I-2-v7  | 1  | 10                        | 7    | 7   | 4    | 10   | 7   | 5    | 2    | 2    | 4    |
|                               | LA             | Y           | NFR                | 3I-2-v8  | 1  | 10                        | 7    | 7   | 4    | 10   | 6   | 5    | 2    | 2    | 4    |
|                               | TX             | Y           | Mexico             | 3I-2-v9  | 1  | 8                         | 7    | 8   | 4    | 9    | 7   | 5    | 2    | 2    | 4    |
|                               | NJ             | N           | Puerto Rico        | 3I-2-v2  | 1  | 11                        | 7    | 8   | 4    | 10   | 6   | 5    | 2    | 2    | 4    |
|                               | PR             | N           | Puerto Rico        | 3I-2-v11 | 1  | 10                        | 8    | 9   | 5    | 10   | 7   | 5    | 2    | 2    | 4    |
|                               | CA             | N           | Samoa              | 3I-2-v7  | 1  | 10                        | 7    | 7   | 4    | 10   | 7   | 5    | 2    | 2    | 4    |
|                               | TX             | Y           | Guam               | 3K-v1    | 1  | 8                         | 8    | 8   | 4    | 9    | 7   | 4    | 2    | 2    | 5    |
|                               | TX             | Y           | Philippines        | 3K-v2    | 1  | 8                         | 8    | 8   | 4    | 8    | 7   | 4    | 2    | 2    | 5    |
| OR                            | N              | Micronesia  | 3K-v3              | 1        | 9  | 7                         | 9    | 4   | 8    | 9    | 4   | 1    | 2    | 5    |      |
| SC                            | N              | Philippines | 3K-v4              | 1        | 8  | 8                         | 9    | 5   | 11   | 6    | 4   | 3    | 2    | 4    |      |
| LA                            | Y              | NFR         | 3L-v1              | 1        | 10 | 7                         | 8    | 4   | 8    | 7    | 5   | 2    | 2    | 5    |      |
| OH                            | N              | Tanzania    | 3L-v2              | 1        | 10 | 7                         | 8    | 4   | 13   | 6    | 3   | 2    | 2    | 6    |      |
| MI                            | N              | India       | 3L-v3              | 1        | 8  | 7                         | 8    | 4   | 8    | 6    | 4   | 2    | 2    | 5    |      |
| WARM                          | AL, AR, MS, TX | Y           | NFR                | 3I-2-v1  | 28 | 10                        | 7    | 8   | 4    | 10   | 7   | 5    | 2    | 2    | 4    |
|                               | LA, AL         | Y           | NFR                | 3I-2-v13 | 3  | 10                        | 7    | 8   | 4    | 10   | 7   | 6    | 2    | 2    | 4    |
|                               | LA             | Y           | NFR                | 3I-2-v14 | 2  | 10                        | 7    | 8   | 4    | 10   | 7   | 5    | 2    | 1    | 4    |

*M. leprae* genotypes were determined as shown in Figure 2. Complete data of all 114 SNPs and 10 VNTR Loci is available as supplementary Table S1. #, VNTR profile represents the number of repeat copies found at a particular locus. \*, Residence history is as reported by patient; NFR: No Foreign Residence; EE: Endemic Exposure, living in areas with potential exposure to *M. leprae* through armadillos; n: number of strains with same genotype; WARM: Wild Armadillo *M. leprae*.

**Table S6. Case control studies and contingency analysis:**

**A. 3I-1 v 3I-2 Strain Distribution in North and South America**

Fisher's Exact Test, Two-sided  $P < 0.001$

Odds Ratio=27.000, 95% Confidence Interval 8.312 to 87.7

Data analyzed:

|              | <b>3I-1</b> | <b>3I-2</b> | <b>Total</b>  |
|--------------|-------------|-------------|---------------|
| <b>South</b> | 48<br>(46%) | 16<br>(15%) | 64<br>(62%)   |
| <b>North</b> | 4<br>(4%)   | 36<br>(35%) | 40<br>(38%)   |
| <b>Total</b> | 52<br>(50%) | 52<br>(50%) | 104<br>(100%) |

**B. 3I-2-v1 Association with Armadillo Exposure (EE/NE)**

Fisher's Exact Test, Two-sided  $P < 0.001$

Odds Ratio=54.517, 95% Confidence Interval 3.031 to 980.67

Data analyzed: (0.5 added to each value for analysis) Includes Reference Strains

|                | <b>Endemic Exposure<br/>(EE)</b> | <b>Non-Endemic<br/>Exposure (NE)</b> | <b>Total</b> |
|----------------|----------------------------------|--------------------------------------|--------------|
| <b>3I-2-v1</b> | 25<br>(46%)                      | 0<br>(0%)                            | 64<br>(46%)  |
| <b>Other</b>   | 14<br>(26%)                      | 15<br>(28%)                          | 29<br>(54%)  |
| <b>Total</b>   | 39<br>(72%)                      | 15<br>(28%)                          | 54<br>(100%) |

**C. 3I-2-v1 Association with Residence History (NFR/FR)**

Fisher's Exact Test, Two-sided P<0.0001

Odds Ratio=16.5, 95% Confidence Interval 4.207 to 64.713

Data analyzed: Includes Reference Strains

|                | <b>No Foreign<br/>Residence (NFR)</b> | <b>Foreign Residence<br/>(FR)</b> | <b>Total</b> |
|----------------|---------------------------------------|-----------------------------------|--------------|
| <b>3I-2-v1</b> | 21<br>(39%)                           | 4<br>(7%)                         | 25<br>(46%)  |
| <b>Other</b>   | 7<br>(13%)                            | 22<br>(41%)                       | 29<br>(54%)  |
| <b>Total</b>   | 28<br>(52%)                           | 26<br>(48%)                       | 54<br>(100%) |

**D. 3I-2-v1 Associations with Patient Reported Armadillo Contact History**

Fisher's Exact Test, Two-sided P=0.3147

Odds Ratio=4.0, 95% Confidence Interval 0.4468 to 35.807

Data analyzed:

|              | <b>3I-2-v1</b> | <b>Other</b> | <b>Total</b> |
|--------------|----------------|--------------|--------------|
| <b>Yes</b>   | 6<br>(40%)     | 2<br>(13%)   | 8<br>(53%)   |
| <b>No</b>    | 3<br>(20%)     | 4<br>(27%)   | 7<br>(47%)   |
| <b>Total</b> | 9<br>(60%)     | 6<br>(40%)   | 15<br>(100%) |
